# Supplementary material for: Methenamine hippurate to prevent recurrent urinary tract infections in older women: protocol for a randomised, placebo-controlled trial (ImpresU)
Source: PubMed Central journal article supplement — BMJ Open. 2022 Nov 1;12(11):e065217. doi: 10.1136/bmjopen-2022-065217 (PMC10098264; doi:10.1136/bmjopen-2022-065217), 2022-11-01
Supplement: bmjopen-2022-065217supp002.pdf [file bmjopen-2022-065217supp002.pdf]

Date/start medication: \_\_\_\_\_

PatientstudyID: \_\_\_\_\_

 **ImpresU**

**PATIENT INFORMATION**

- The study medication is taken **1 tablet twice daily for 6 months**. The total study period is 12 months.
- In case of a urinary tract infection: contact your doctor.
- Bring a urine sample to the doctor's appointment.
- After the doctor's appointment, contact: **(study phone)**
- The study team will call you once a week until the infection has cleared.
- The study team will also call you once a month in the 6 months of medication to check how you are doing.

**SHOW THIS CARD IF YOU ARE IN CONTACT WITH HEALTH CARE PERSONNEL OTHER THAN YOUR GP**

 **ImpresU**

**HEALTH CARE PERSONNEL**

- The study lasts for **12 months** from start of medication.
- The **first 6 months**, the patient will receive:  
**Methenamine hippurate 1g x 2 OR placebo 1 tbl x 2**
- In case of a UTI, we ask that symptoms are recorded and that a copy of the relevant EPJ note and results of dipstick/culture, if taken, are sent to the patients' GP.
- Methenamine hippurate has few and mild side-effects.
- In case of a serious adverse event, contact **(study phone)**
- If the patient is starting long-term treatment with antacids (**Your generic names®**) while receiving study medication, the patient has to be excluded from the study.
- The study medication has to be temporarily paused in the case of severe dehydration or treatment with sulphonamide antibiotics (**your generic names®**) until rehydrated/end of sulphonamide treatment.
